1 **Antiviral activity of Pacific oyster (*Crassostrea gigas*) hemolymph**  
2 **against a human coronavirus.**

3 Rebecca L. Pedler<sup>a</sup>, James O. Harris<sup>a</sup>, Peter G. Speck<sup>a#</sup>

4 <sup>a</sup>College of Science and Engineering, Flinders University, Bedford Park, South Australia,  
5 Australia.

6

7 Running Head: Antiviral activity of *C. gigas* against HCoV-229E

8

9 #Address correspondence to Peter G. Speck, [peter.speck@flinders.edu.au](mailto:peter.speck@flinders.edu.au)

10 Mailing address:

11 *College of Science and Engineering, Flinders University, Bedford Park,*

12 *GPO Box 2100*

13 *Adelaide 5001,*

14 *South Australia, Australia.*

15 **ABSTRACT**

16 Coronaviruses can cause severe respiratory infections in humans. This study aimed to assess  
17 the antiviral activity of Pacific oyster (*Crassostrea gigas*) hemolymph against a human  
18 coronavirus, HCoV-229E. An eight-fold reduction in infectivity of HCoV-229E on Huh-7  
19 cells was observed in the presence of 10% *C. gigas* hemolymph. Antiviral activity of *C. gigas*  
20 hemolymph positively correlated with its concentration and appears to be active during an  
21 intracellular stage of HCoV-229E infection.

22 **KEYWORDS:** molluscan antivirals, HCoV-229E, marine invertebrates, *Crassostrea gigas*,  
23 SARS-CoV-2

24 Human coronaviruses are enveloped, single stranded RNA viruses that are further classified  
25 as alpha-coronaviruses (human coronavirus-229E (HCoV-229E) and HCoV-NL63) or beta-  
26 coronaviruses (HCoV-OC43, HCoV-HKU1, middle eastern respiratory syndrome (MERS-  
27 CoV), severe acute respiratory syndrome (SARS-CoV) and SARS-CoV-2) (1). SARS-CoV-2  
28 is a novel human coronavirus which emerged in December 2019 as the causative agent of  
29 coronavirus disease 2019 (Covid-19) (2-4). Safe and effective antiviral treatments for SARS-  
30 CoV-2 are yet to be identified, despite multiple drug repurposing attempts (5-7).

31

32 Marine molluscs represent an unexploited source of medicinal compounds (Pedler and  
33 Speck, Rev. Med. Virol, in press) (8-11). Marine molluscs lack an adaptive immune system  
34 and exclusively elicit innate immune responses (12-14), while living in an environment  
35 containing virus particles in the order of  $>10^7$  per ml (15, 16). This demonstrates the success  
36 of their strategies to prevent viral infection, which includes production of potent antiviral  
37 compounds (11, 13). *In vitro* inhibition of HSV-1 has been observed using extracts from the  
38 common cockle (*Cerastoderma edule*), greenlip abalone (*Haliotis laevis*) (17), Japanese  
39 carpet shell (*Ruditapes philippinarum*), European flat oyster (*Ostrea edulis*), common whelk  
40 (*Buccinum undatum*) (18), blacklip abalone (*Haliotis rubra*) (19, 20), veined rapa whelk  
41 (*Rapanosa venosa*) (21) and Mediterranean mussel (*Mytilus galloprovincialis*) (22). Extract  
42 from the flesh of the red abalone (*Haliotis rufescens*) protect mice against poliovirus and  
43 influenza A (23, 24), while paolin II from the Eastern oyster (*Crassostrea virginica*) inhibits  
44 poliovirus (25).

45

46 Hemolymph of the Pacific oyster (*Crassostrea gigas*) has *in vitro* antiviral activity against  
47 HSV-1 and adenovirus respiratory strain 5 (AdV-5) (26-28). The major *C. gigas* hemolymph  
48 protein, cavortin, exerts an antiviral effect against HSV-1 after entry into Vero cells (26).

49 Cavortin is a Mr 20,000 protein which acts as a metal chaperone (29). Intracellular zinc has  
50 therapeutic potential for SARS-CoV-2 (30-32), and its efficacy is improved by coupling with  
51 a metal chaperone (31, 33). *Crassostrea gigas* has a high zinc content (34) and given  
52 cavortin's suggested role as a metal chaperone (29), it is possible that *C. gigas* cavortin has  
53 potential antiviral activity against SARS-CoV-2 and may facilitate zinc transport into host  
54 cells.

55

56 The discovery of antiviral agents for SARS-CoV-2 is challenged by the limited number of  
57 laboratories with the appropriate biosafety containment level (35, 36). HCoV-229E can be  
58 handled in lesser-rated laboratories making it more accessible for research on human  
59 coronaviruses (37) and this virus could be used for initial screening for anti-coronavirus  
60 activity. This study is the first we are aware of that assesses antiviral activity of *C. gigas*  
61 hemolymph against HCoV-229E.

62

63 Huh-7 cells, obtained from M. Beard were grown in Dulbecco's modified eagle medium  
64 (DMEM) (Gibco #11965118) supplemented with 10% foetal bovine serum (FBS) (Gibco  
65 #10099141), according to standard methods (38). Twelve *C. gigas* oysters, grown in Coffin  
66 Bay, South Australia, were purchased from local seafood merchants. After opening, *C. gigas*  
67 hemolymph was extracted from the pericardial cavity using a sterile syringe and 27g needle.  
68 Hemolymph was pooled, sterilised using a 0.2 $\mu$ m filter and stored at -20°C until required.  
69 Cytotoxicity of *C. gigas* hemolymph was determined using a trypan blue exclusion assay  
70 (26). Huh-7 cells were seeded into a 24-well plate with medium as above and 0%, 2%, 5%,  
71 10% or 20% (v/v) *C. gigas* hemolymph. Cells were incubated for two days at 37°C in 5%  
72 CO<sub>2</sub>, before being stained *in situ* with 0.4% trypan blue (Gibco #15250061) (26). The number  
73 of non-viable cells in three different fields of view were counted using an Olympus CK2

74 microscope at 40x magnification (39). The mean number of non-viable cells was lowest for  
75 0% ( $1.00 \pm 0.00$  cells) and 2% ( $1.00 \pm 0.47$  cells) (Fig. 1). Huh-7 cell death sharply increased  
76 as hemolymph concentration exceeded 10% (Fig. 1), therefore 10% was considered an  
77 appropriate concentration for use in anti-HCoV-229E assays. In Vero cells, *C. gigas*  
78 hemolymph can cause 10% cell death at a concentration of 13% (v/v) (26) or 50% cell death  
79 at  $750\mu\text{g ml}^{-1}$  (27). The acellular and cellular fractions of *C. gigas* hemolymph can cause  
80 50% cell death in Hep-2 cells at concentrations of  $0.32\text{mg ml}^{-1}$  and  $0.19\text{mg ml}^{-1}$  respectively  
81 (28).

82

83 HCoV-229E was obtained from H. Whiley . Virus titres were determined as 50% tissue  
84 culture infective doses (TCID<sub>50</sub>) (40). Huh-7 cells were seeded into 96-well plates contain  
85 either 0 or 10% *C. gigas* hemolymph. Three ten-fold dilutions, followed by eight two-fold  
86 dilutions were prepared using HCoV-229E stock and DMEM and inoculated into 96-well  
87 plates. Cells were incubated at 37°C in 5% CO<sub>2</sub> for five days before being fixed with 10%  
88 formaldehyde and stained with 0.5% crystal violet (Thermo #S25275B). Wells illustrating  
89 cytopathic effect were counted, allowing TCID<sub>50</sub> to be calculated using the Reed-Muench  
90 method (41). When Huh-7 cells were assayed with 10% *C. gigas* hemolymph, an eight-fold  
91 reduction in the HCoV-229E titre ( $4.00 \times 10^5$  TCID<sub>50</sub> ml<sup>-1</sup>) which is an antiviral activity of  
92 87.5%, was observed (Table 1). A dose-response curve was generated using 0%, 2%, 5%,  
93 10% and 15% *C. gigas* hemolymph which revealed that antiviral activity positively correlated  
94 with its concentration (Table 1, Fig. 3). This is consistent with the dose-dependent antiviral  
95 activity of *C. gigas* hemolymph protein, cavortin, against HSV-1 (26).

96

97 Time of addition assays were used to determine the stage of HCoV-229E infection targeted  
98 by *C. gigas* hemolymph. In previous studies, the greatest antiviral protection of Vero cells,

99 from HSV-1 infection was observed when *C. gigas* hemolymph was added 0-2 hours after  
100 infection (26, 27), suggesting that the antiviral effect was likely exerted after virus attachment  
101 and entry. An intracellular mode of antiviral action has been observed for other molluscan  
102 compounds, including lipophilic extract of *H. laevigata* (17) and myticin C peptides from *M.*  
103 *galloprovincialis* (22). Here, Huh-7 cells were seeded into 24-well plates with DMEM and  
104 10% FBS. A series of dilutions ( $10^{-4}$ ,  $10^{-5}$ ,  $10^{-6}$  and  $10^{-7}$ ) were prepared using HCoV-229E  
105 stock and DMEM and inoculated into plates. *C. gigas* hemolymph was added immediately or  
106 60 minutes after HCoV-229E. There was little difference in *C. gigas* hemolymph antiviral  
107 activity when it was added to Huh-7 cells immediately (98.21%) or 60 minutes after HCoV-  
108 229E infection (96.11%) (Table 2). This suggests that *C. gigas* hemolymph most likely acts  
109 during an intracellular stage of HCoV-229E infection. Antiviral compounds which act during  
110 an intracellular stage of HCoV-229E infection have been identified (42-44). The macrolide  
111 and immunosuppressive compound, FK06 inhibits HCoV-229E replication in Huh-7 cells  
112 (44), while the antimalarial drug chloroquine inhibits HCoV-229E replication in epithelial  
113 lung cells (L132) by suppressing P38MAPK (43). Thapsigargin, from the Thapsia (*Thapsia*  
114 *garganica*) plant acts during an intracellular stage of HCoV-229E infection either by  
115 inhibiting replication or activating unknown antiviral effector systems in Huh-7 cells (42).  
116  
117 This study reveals that *C. gigas* hemolymph has *in vitro* antiviral activity against human  
118 coronavirus HCoV-229E. This finding is relevant in the current pandemic and reinforces that  
119 *C. gigas* hemolymph has broad-spectrum antiviral activity. Further research is required to  
120 identify and characterise the antiviral compound(s) produced by *C. gigas*.

## 121 REFERENCES

- 122 1. Woo PCY, Huang Y, Lau SKP, Yuen K-Y. 2010. Coronavirus genomics and  
123 bioinformatics analysis. *Viruses* 2:1805-1820.
- 124 2. Wang C, Horby PW, Hayden FG, Gao GF. 2020. A novel coronavirus outbreak of  
125 global health concern. *Lancet* 395:470-473.

- 126 3. Ghanbari R, Teimoori A, Sadeghi A, Mohamadkhani A, Rezasoltani S, Asadi E,  
127 Jouyban A, Sumner SCJ. 2021. Existing antiviral options against SARS-CoV-2  
128 replication in COVID-19 patients. *Future Microbiol* 15.
- 129 4. Triggler CR, Bansal D, Ding H, Islam MM, Farag EABA, Hadi HA, Sultan AA. 2021. A  
130 comprehensive review of viral characteristics, transmission, pathophysiology,  
131 immune response, and management of SARS-CoV-2 and COVID-19 as a basis for  
132 controlling the pandemic. *Front Immunol* 12:631139.
- 133 5. Wang M, Cao R, Zhang L, Yang X, Liu J, Xu M, Shi Z, Hu Z, Zhong W, Xiao G. 2020.  
134 Remdesivir and chloroquine effectively inhibit the recently emerged novel  
135 coronavirus (2019-nCoV) in vitro. *Cell Res* 30:269-271.
- 136 6. Beigel JH, Tomashek KM, Dodd LE, Mehta AK, Zingman BS, Kalil AC, Hohmann E, Chu  
137 HY, Luetkemeyer A, Kline S, Lopez de Castilla D, Finberg RW, Dierberg K, Tapon V,  
138 Hsieh L, Patterson TF, Paredes R, Sweeney DA, Short WR, Touloumi G, Lye DC,  
139 Ohmagari N, Oh M-d, Ruiz-Palacios GM, Benfield T, Fätkenheuer G, Kortepeter MG,  
140 Atmar RL, Creech CB, Lundgren J, Babiker AG, Pett S, Neaton JD, Burgess TH, Bonnett  
141 T, Green M, Makowski M, Osinusi A, Nayak S, Lane HC. 2020. Remdesivir for the  
142 treatment of Covid-19 — final report. *N Engl J Med* 383:1813-1826.
- 143 7. Indari O, Jakhmola S, Manivannan E, Jha HC. 2021. An update on antiviral therapy  
144 against SARS-CoV-2: How far have we come? *Front Pharmacol* 12:632677.
- 145 8. Benkendorff K. 2010. Molluscan biological and chemical diversity: secondary  
146 metabolites and medicinal resources produced by marine molluscs. *Biol Rev Camb*  
147 *Philos Soc* 85:757-775.
- 148 9. Summer K, Browne J, Liu L, Benkendorff K. 2020. Molluscan compounds provide drug  
149 leads for the treatment and prevention of respiratory disease. *Mar Drugs* 18:570.
- 150 10. Riccio G, Ruocco N, Mutalipassi M, Costantini M, Zupo V, Coppola D, de Pascale D,  
151 Lauritano C. 2020. Ten-year research update review: Antiviral activities from marine  
152 organisms. *Biomolecules* 10:1-36.
- 153 11. Sagar S, Kaur M, Minneman KP. 2010. Antiviral lead compounds from marine  
154 sponges. *Mar Drugs* 8:2619-2638.
- 155 12. Agius JR, Corbeil S, Helbig KJ. 2020. Immune control of herpesvirus infection in  
156 molluscs. *Pathogens (Basel)* 9:1-11.
- 157 13. Dang VT, Benkendorff K, Green T, Speck P. 2015. Marine snails and slugs: A great  
158 place to look for antiviral drugs. *J Virol* 89:8114-8118.
- 159 14. Tiscar PG, Mosca F. 2004. Defense mechanisms in farmed marine molluscs. *Vet Res*  
160 *Commun* 28:57-62.
- 161 15. Bratbak G, Heldal M, Børshheim KY, Bergh Ø. 1989. High abundance of viruses found  
162 in aquatic environments. *Nature* 340:467-468.
- 163 16. Suttle CA. 2007. Marine viruses - major players in the global ecosystem. *Nat Rev*  
164 *Microbiol* 5:801-812.
- 165 17. Dang VT, Benkendorff K, Speck P. 2011. *In vitro* antiviral activity against herpes  
166 simplex virus in the abalone *Haliotis laevis*. *J Gen Virol* 92:627-637.
- 167 18. Defer D, Bourgougnon N, Fleury Y. 2009. Screening for antibacterial and antiviral  
168 activities in three bivalve and two gastropod marine molluscs. *Aquaculture* 293:1-7.
- 169 19. Talaei Zanjani N, Miranda-Saksena M, Valtchev P, Diefenbach RJ, Hueston L,  
170 Diefenbach E, Sairi F, Gomes VG, Cunningham AL, Dehghani F. 2016. Abalone  
171 hemocyanin blocks the entry of herpes simplex virus 1 into cells: A potential new  
172 antiviral strategy. *Antimicrob Agents Chemother* 60:1003-1012.

- 173 20. Dang VT, Speck P, Doroudi M, Smith B, Benkendorff K. 2011. Variation in the antiviral  
174 and antibacterial activity of abalone *Haliotis laevis*, *H. rubra* and their hybrid in  
175 South Australia. *Aquaculture* 315:242-249.
- 176 21. Nesterova NV, Zagorodnya SD, Moshtanska V, Dolashka P, Baranova GV, Golovan AV,  
177 Kurova AO. 2011. Antiviral activity of hemocyanin isolated from marine snail *Rapana*  
178 *venosa*. *Antiviral Res* 90:A38-A38.
- 179 22. Novoa B, Romero A, Álvarez ÁL, Moreira R, Pereiro P, Costa MM, Dios S, Estepa A,  
180 Parra F, Figueras A. 2016. Antiviral activity of myticin C peptide from mussel: An  
181 ancient defense against herpesviruses. *J Virol* 90:7692-7702.
- 182 23. Li C, Precott B, Jahnes W. 1962. Antiviral activity of a fraction of abalone juice. *Proc*  
183 *Soc Exo Biol Med* 109:534-538.
- 184 24. Li C. 1960. Antimicrobial effect of abalone juice. *Proc Soc Exo Biol Med* 103:522-524.
- 185 25. Prescott B, Li C, Caldes G, Martino E. Chemical studies of Paolin. II. An antiviral  
186 substance from oysters. *Proc Soc Exo Biol Med* 123:460-464.
- 187 26. Green TJ, Robinson N, Chataway T, Benkendorff K, O'Connor W, Speck P. 2014.  
188 Evidence that the major hemolymph protein of the Pacific oyster, *Crassostrea gigas*,  
189 has antiviral activity against herpesviruses. *Antiviral Res* 110:168-174.
- 190 27. Olicard C, Renault T, Torhy C, Benmansour A, Bourgougnon N. 2005. Putative  
191 antiviral activity in hemolymph from adult Pacific oysters, *Crassostrea gigas*. *Antiviral*  
192 *Res* 66:147-152.
- 193 28. Carriel-Gomes MC, Kratz JM, Muller VDM, Barardi CRM, Simues CMO. 2006.  
194 Evaluation of antiviral activity in hemolymph from oysters *Crassostrea rhizophorae*  
195 and *Crassostrea gigas*. *Aquat Living Resour* 19:189-193.
- 196 29. Scotti PD, Dearing SC, Greenwood DR. 2007. Characterisation of cavortin, the major  
197 haemolymph protein of the Pacific oyster (*Crassostrea gigas*). *N Z J Mar Freshwater*  
198 *Res* 41:91-101.
- 199 30. Carlucci PM, Ahuja T, Petrilli C, Rajagopalan H, Jones S, Rahimian J. 2020. Zinc sulfate  
200 in combination with a zinc ionophore may improve outcomes in hospitalized COVID-  
201 19 patients. *J Med Microbiol* 69:1228-1234.
- 202 31. Brewer J, Gomez Marti JL, Brufsky A. 2021. Potential interventions for SARS-CoV-2  
203 infections: Zinc showing promise. *J Med Virol* 93:1201-1203.
- 204 32. Asl SH, Nikfarjam S, Majidi Zolbanin N, Nassiri R, Jafari R. 2021.  
205 Immunopharmacological perspective on zinc in SARS-CoV-2 infection. *Int*  
206 *Immunopharmacol* 96:107630.
- 207 33. te Velthuis AJW, van den Worml SHE, Sims AC, Baric RS, Snijder EJ, van Hemert MJ.  
208 2010. Zn<sup>2+</sup> inhibits coronavirus and arterivirus RNA polymerase activity in vitro and  
209 zinc ionophores block the replication of these viruses in cell culture. *PLoS pathogens*  
210 6:e1001176.
- 211 34. Kong N, Zhao Q, Liu C, Li J, Liu Z, Gao L, Wang L, Song L. 2020. The involvement of  
212 zinc transporters in the zinc accumulation in the Pacific oyster *Crassostrea gigas*.  
213 *Gene* 750:144759-144759.
- 214 35. Kaufer AM, Theis T, Lau KA, Gray JL, Rawlinson WD. 2020. Laboratory biosafety  
215 measures involving SARS-CoV-2 and the classification as a Risk Group 3 biological  
216 agent. *Pathology* 52:790-795.
- 217 36. Hall MD, Anderson JM, Anderson A, Baker D, Bradner J, Brimacombe KR, Campbell  
218 EA, Corbett KS, Carter K, Cherry S, Chiang L, Cihlar T, de Wit E, Denison M, Disney M,  
219 Fletcher CV, Ford-Scheimer SL, Götte M, Grossman AC, Hayden FG, Hazuda DJ,



- 220 Lanteri CA, Marston H, Mesecar AD, Moore S, Nwankwo JO, O'Rear J, Painter G,  
221 Saikatendu KS, Schiffer CA, Sheahan TP, Shi P-Y, Smyth HD, Sofia MJ, Weetall M,  
222 Weller SK, Whitley R, Fauci AS, Austin CP, Collins FS, Conley AJ, Davis MI. 2021.  
223 Report of the national institutes of health SARS-CoV-2 antiviral therapeutics summit.  
224 J Infect Dis 224:S1-S21.
- 225 37. Bracci N, Pan H-C, Lehman C, Kehn-Hall K, Lin S-C. 2020. Improved plaque assay for  
226 human coronaviruses 229E and OC43. PeerJ 8:e10639-e10639.
- 227 38. Thermofisher. 2021. Gibco Cell Culture Basics.  
228 [https://www.thermofisher.com/au/en/home/references/gibco-cell-culture-](https://www.thermofisher.com/au/en/home/references/gibco-cell-culture-basics.html)  
229 [basics.html](https://www.thermofisher.com/au/en/home/references/gibco-cell-culture-basics.html). Accessed October 24th.
- 230 39. Strober W. 2019. Trypan blue exclusion test of cell viability. Curr Protoc Immunol  
231 111.
- 232 40. Smither SJ, Lear-Rooney C, Biggins J, Pettitt J, Lever MS, Olinger GG. 2013.  
233 Comparison of the plaque assay and 50% tissue culture infectious dose assay as  
234 methods for measuring filovirus infectivity. J Virol Methods 193:565-571.
- 235 41. Reed LJ, Muench H. 1938. A simple method of estimating fifty per cent endpoints.  
236 Am J Epidemiol 27.
- 237 42. Shaban MS, Müller C, Mayr-Buro C, Weiser H, Meier-Soelch J, Albert BV, Weber A,  
238 Linne U, Hain T, Babayev I, Karl N, Hofmann N, Becker S, Herold S, Schmitz ML,  
239 Ziebuhr J, Kracht M. 2021. Multi-level inhibition of coronavirus replication by  
240 chemical ER stress. Nature communications 12:5536-5536.
- 241 43. Kono M, Tatsumi K, Imai AM, Saito K, Kuriyama T, Shirasawa H. 2008. Inhibition of  
242 human coronavirus 229E infection in human epithelial lung cells (L132) by  
243 chloroquine: Involvement of p38 MAPK and ERK. Antiviral Res 77:150-152.
- 244 44. Carbajo-Lozoya J, Müller MA, Kallies S, Thiel V, Drosten C, von Brunn A. 2012.  
245 Replication of human coronaviruses SARS-CoV, HCoV-NL63 and HCoV-229E is  
246 inhibited by the drug FK506. Virus Res 165:112-117.

247

248

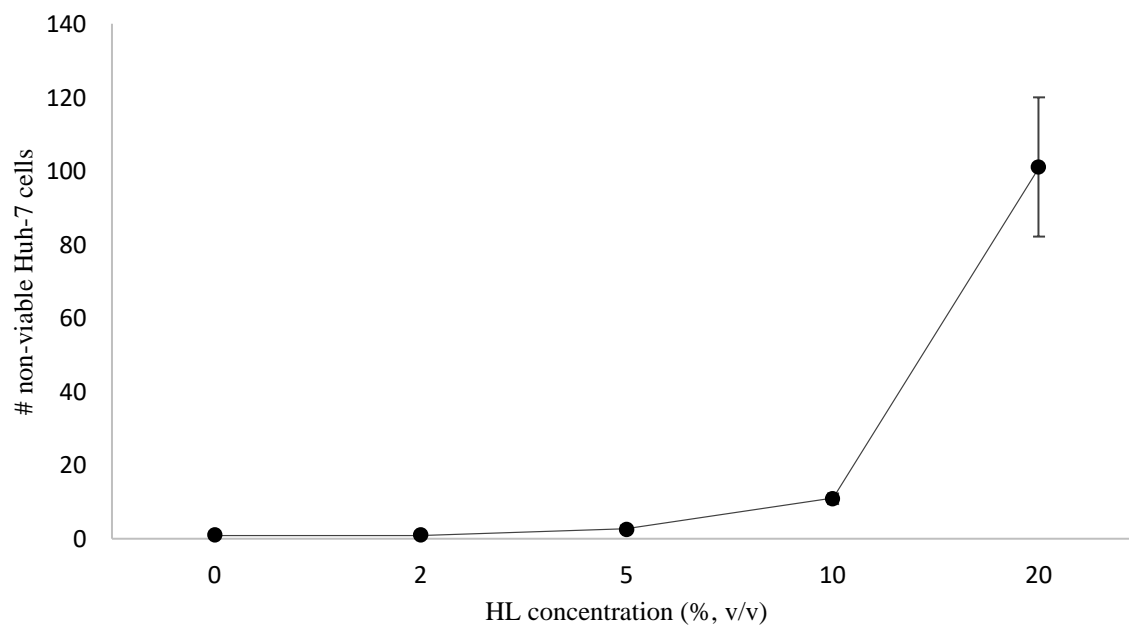

249

250 FIG. 1. Mean ( $\pm$  standard deviation) number of non-viable Huh-7 cells treated with varying  
251 concentrations of Pacific oyster (*Crassostrea gigas*) hemolymph (0, 2, 5, 10, 20% v/v).

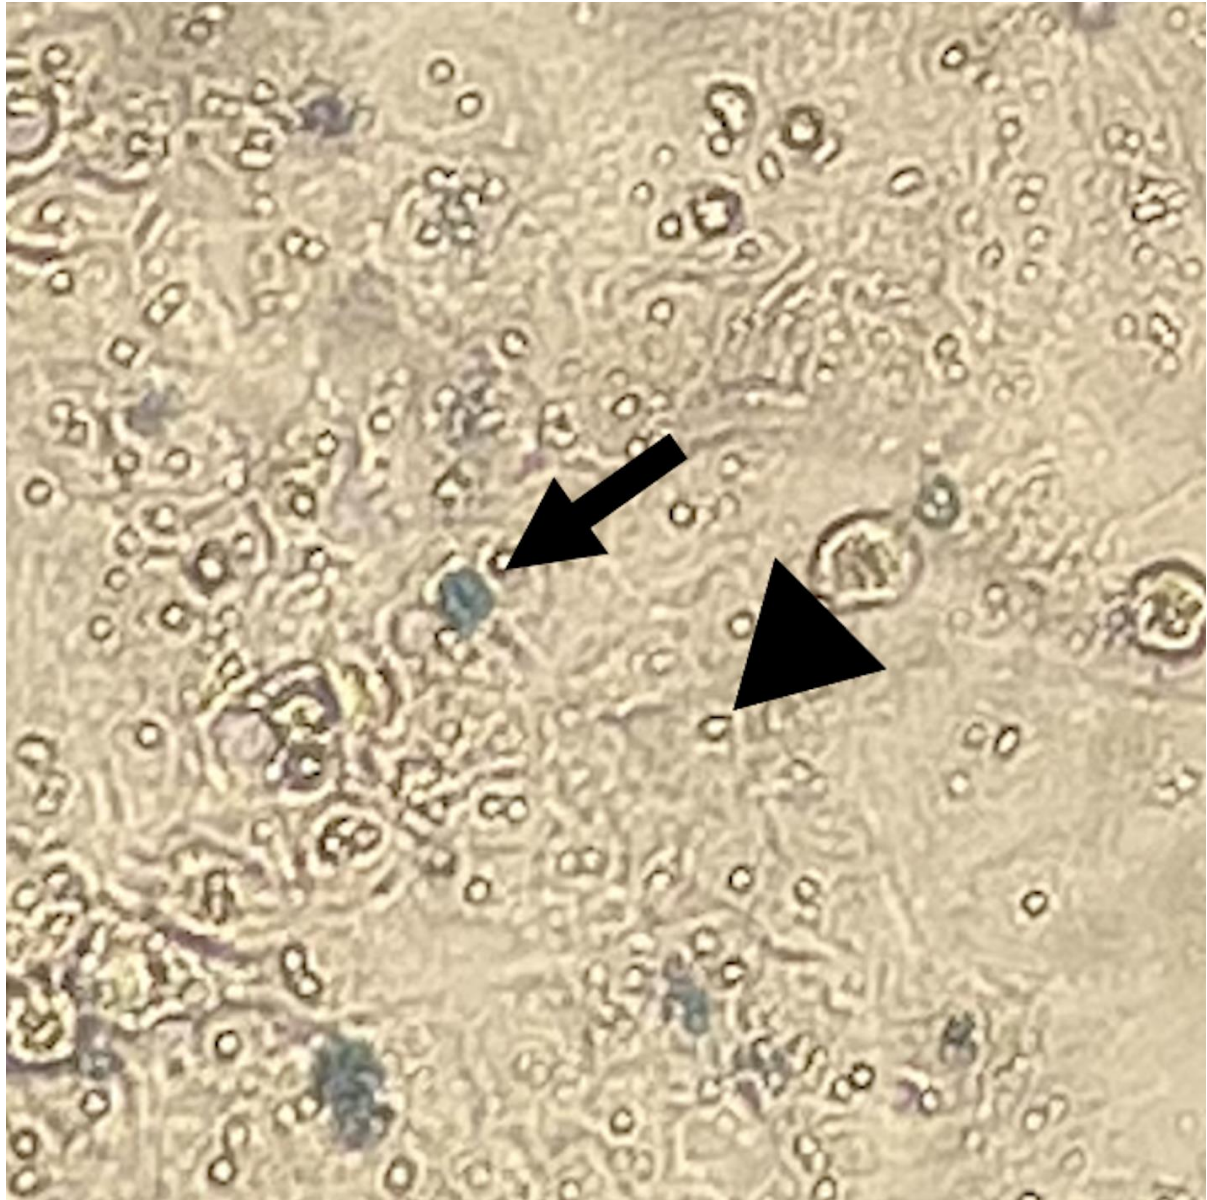

252

253 FIG. 2. non-viable (arrow) and viable (arrowhead) Huh-7 cells treated with 20% Pacific

254 oyster (*Crassostrea gigas*) hemolymph.

255 TABLE 1. Virus titre values (TCID<sub>50</sub> ml<sup>-1</sup>) for human coronavirus 229E (HCoV-229E) in  
256 Huh-7 cells treated with varying concentrations (0, 2, 5, 10, 15% v/v) of Pacific oyster  
257 (*Crassostrea gigas*) hemolymph.

| Extract/control               | Virus titre (TCID <sub>50</sub> ml <sup>-1</sup> ) | Antiviral activity: %<br>Reduction in virus titre |
|-------------------------------|----------------------------------------------------|---------------------------------------------------|
| Negative control (DMEM)       | 3.20 × 10 <sup>6</sup>                             | 0.00                                              |
| 2% <i>C. gigas</i> hemolymph  | 8.00 × 10 <sup>5</sup>                             | 75.00                                             |
| 5% <i>C. gigas</i> hemolymph  | 7.92 × 10 <sup>5</sup>                             | 75.24                                             |
| 10% <i>C. gigas</i> hemolymph | 4.00 × 10 <sup>5</sup>                             | 87.50                                             |
| 15% <i>C. gigas</i> hemolymph | 2.83 × 10 <sup>5</sup>                             | 91.16                                             |

258

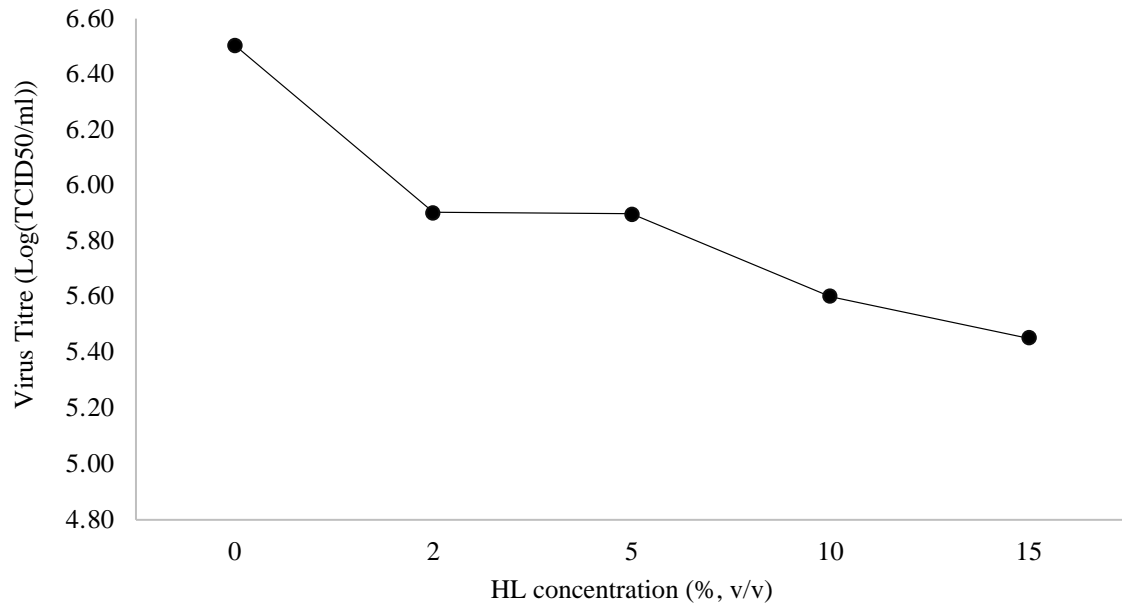

259

260 FIG. 3. Virus titre values ( $\text{Log}(\text{TCID}_{50} \text{ ml}^{-1})$ ) for human coronavirus 229E (HCoV-229E) in  
261 Huh-7 cells treated with varying concentrations (0, 2, 5, 10, 15% v/v) of Pacific oyster  
262 (*Crassostrea gigas*) hemolymph (HL).

263 TABLE 2. Virus titres (TCID<sub>50</sub> ml<sup>-1</sup>) and antiviral activity (% reduction in virus titre) for  
264 human coronavirus 229E (HCoV-229E) in Huh-7 cells treated with either 0% (negative  
265 control) or 10% Pacific oyster (*Crassostrea gigas*).

| Extract/control               | Time of extract addition    | Virus titre (TCID <sub>50</sub> ml <sup>-1</sup> ) | Antiviral activity: % reduction in virus titre |
|-------------------------------|-----------------------------|----------------------------------------------------|------------------------------------------------|
| Negative control (DMEM)       | -                           | $2.79 \times 10^8$                                 | 0.00                                           |
| 10% <i>C. gigas</i> hemolymph | Immediately after infection | $5.00 \times 10^6$                                 | 98.21                                          |
| 10% <i>C. gigas</i> hemolymph | 60minutes after infection   | $1.08 \times 10^7$                                 | 96.11                                          |

266
